1 **Genomic variation in the tea leafhopper reveals the basis of**  
2 **adaptive evolution**

3 Qian Zhao<sup>1,#</sup>, Longqing Shi<sup>1,2,#</sup>, Weiyi He<sup>1</sup>, Jinyu Li<sup>1,3</sup>, Shijun You<sup>1</sup>, Shuai Chen<sup>4</sup>, Jing  
4 Lin<sup>4</sup>, Yibin Wang<sup>4</sup>, Liwen Zhang<sup>1</sup>, Guang Yang<sup>1</sup>, Liette Vasseur<sup>1,5</sup>, Minsheng You<sup>1\*</sup>

5

6 <sup>1</sup> *State Key Laboratory of Ecological Pest Control for Fujian and Taiwan Crops,*  
7 *Institute of Applied Ecology, Fujian Agriculture and Forestry University, Fuzhou*  
8 *350002, China*

9 <sup>2</sup> *Institute of Rice, Fujian Academy of Agricultural Sciences, Fuzhou 350018, China*

10 <sup>3</sup> *Tea Research Institute, Fujian Academy of Agricultural Sciences, Fuzhou 350001,*  
11 *China*

12 <sup>4</sup> *Center for Genomics and Biotechnology, Fujian Provincial Key Laboratory of*  
13 *Haixia Applied Plant Systems Biology, Key Laboratory of Genetics, Fujian*  
14 *Agriculture and Forestry University, Fuzhou 350002, China*

15 <sup>5</sup> *Department of Biological Sciences, Brock University, 1812 Sir Isaac Brock Way, St.*  
16 *Catharines, ON L2S 3A1, Canada*

17 #These authors contributed equally to this work: Qian Zhao and Longqing Shi.

18 \*Correspondence should be addressed to Minsheng You (msyou@fafu.edu.cn,

19 ORCID #0000-0001-9042-6432)

20 **Running title:** Zhao Q et al/ Adaptive evolution of *Empoasca onukii*

21 Counts of words: 5751

22 Tables and figures : 4 tables and 4 figures

23 Supplementary : 17 figures and 14 tables

24

25 **ABSTRACT**

26       The tea green leafhopper (TGL), *Empoasca onukii*, is of biological and economic  
27 interest. Despite numerous studies, the mechanisms underlying its adaptation and  
28 evolution remain enigmatic. Here, we used previously untapped genome and  
29 population genetics approaches to examine how this pest so rapidly has adapted to  
30 different environmental variables and thus has expanded geographically. We complete  
31 a chromosome-level assembly and annotation of the *E. onukii* genome, showing  
32 notable expansions of gene families associated with adaptation to chemoreception and  
33 detoxification. Genomic signals indicating balancing selection highlight metabolic  
34 pathways involved in adaptation to a wide range of tea varieties grown across  
35 ecologically diverse regions. Patterns of genetic variation among 54 *E. onukii* samples  
36 unveil the population structure and evolutionary history across different tea-growing  
37 regions in China. Our results demonstrate that the genomic change in key pathways,  
38 including those linked to metabolism, circadian rhythms and immune system function,  
39 may underlie the successful spread and adaptation of *E. onukii*. This work highlights  
40 the genetic and molecular bases underlying the evolutionary success of a species with  
41 broad economic impact, and provides insight into insect adaptation to host plants,  
42 which will ultimately facilitate more sustainable pest management.

43

44       **KEYWORDS:** tea green leafhopper; genomic variation; population genetics;  
45 local adaptation; evolutionary history

46

47

## 48 Introduction

49 Tea is the most popular beverage worldwide, surpassing coffee and cocoa, with a  
50 production of 6.1 million metric tons in 2019 (ITC;  
51 <https://www.statista.com/statistics/264183/global-production-and-exports-of-tea-since-2004/>).

52 China represents the largest tea producer, consumer, and exporter in the world. In Asia,  
53 the tea green leafhopper (TGL), *Empoasca onukii* (Hemiptera: Cicadellidae),  
54 represents the most devastating pest across tea plantations, causing up to 50%  
55 economic loss of tea production annually [1, 2]. Both nymph and adult TGLs pierce  
56 and suck the sap of tender tea shoots, which are the most important part of the plant to  
57 produce high-quality tea. Adult females also lay their eggs in these shoots, leading to  
58 irreparable damage (Figure S1) [2, 3]. Presence of local TGL populations has been  
59 recorded in China since the 1950s [4]. Its distribution has increased around  
60 tea-producing regions of China, Japan, and Vietnam [5]. *E. onukii* can cause yield loss  
61 of between 15 and 50%, up to 100% in severely damaged plantations [2, 6].

62 *E. onukii* belongs to the most species-rich hemimetabolous order, various species  
63 of which are agricultural pests or human disease vectors [7]. As a monophagous insect,  
64 TGL is well-adapted, both physiologically and biochemically, to different tea varieties  
65 [8]. Thus, the rapid expansion of *E. onukii* raises critical questions concerning which  
66 factors contribute to its successful dispersal and colonization, and how genomic  
67 architecture underlies its broad and rapid ability to adapt.

68 To address the above questions, we generated a chromosomal level genome  
69 assembly of the *E. onukii* by integrating Illumina short reads, Oxford Nanopore long  
70 reads, and high-throughput chromosome conformation capture (Hi-C technology).  
71 This high-quality genome resource enabled us to investigate the genetic basis of  
72 chemoreception and detoxification in this insect, key to adapting to new environments.  
73 Based on 54 re-sequenced genomes of the *E. onukii* samples collected from different  
74 locations across a diverse range of tea-growing regions in China, we analyzed patterns

75 of genomic variation and population structure in this species, allowing us to gain  
76 insights into its evolutionary history and successful, rapid spread and colonization.

## 77 **Results and Discussion**

### 78 **Chromosome-level assembly of the tea green leafhopper**

79 The genome of *E. onukii* was estimated to be ~608Mb based on K-mer analysis.  
80 We combined 61× Illumina short read and 109× Nanopore ONT sequences with  
81 chromosome-scale scaffolding. We informed our assembly using physical mapping of  
82 high-throughput chromatin conformation capture (Hi-C) (Tables S1 and S2), to  
83 generate an assembly based on 599 Mb of sequence, with the mitochondrial  
84 sequences excluded (**Table 1** and Tables S3, S4). This assembly accounted for 98.5%  
85 of the estimated genome size. A total of 592 Mb sequences and 98.83% of assembled  
86 sequences were then anchored onto 10 pseudo-chromosomes using ALLHiC (see  
87 Methods and **Tables 1 and 2**, Figures 1A and S2A). An official gene set was  
88 generated based on alignment of insect gene homologs, *ab initio* predictions, and  
89 transcriptomic evidence. Genome annotation predicted 19,642 protein coding genes  
90 with 92.5% BUSCO completeness in TGLs (Table 1 and S5). The sequenced *E.*  
91 *onukii* genome showed high heterozygosity (2.8%), with 13,122,207 heterozygous  
92 SNPs, 3,796,369 heterozygous indels, and complex segmental duplication patterns  
93 (**Figure 1A**). We also assembled the mitochondrial genome, which had a total length  
94 of 14.2 kb and 13 protein-coding genes annotated (Figure S2B).

95 Compared to recently published Hemiptera genomes [9, 10], this assembly is a  
96 high-quality genome with 92.7% BUSCO completeness (Tables S4 and S6). Around  
97 92.3% (337.5/365.8 million) of the Illumina short reads were mapped to the  
98 assembled reference, representing about ~94% of the genome (Table S7).  
99 Well-organized patterns of interacting contact along the diagonal for each  
100 pseudo-chromosome confirmed the high-quality chromosome-level assembly (Figure  
101 S2). In addition, assessment using the LTR Assembly Index (LAI) [11] revealed that  
102 more intact LTRs were recalled in our assembly than previously published insect

103 genomes [9, 10], further supporting the high quality of the TGL genome (Figure  
104 S3A).

105 In total, 19,642 genes were annotated in *E. onukii* and compared with five other  
106 well-annotated Hemiptera published genomes including *Diuraphis noxia* [12],  
107 *Acyrtosiphon pisum* [13], *Cimex lectularius* [9], *Nilaparvata lugens* [14], and *Myzus*  
108 *persicae* ([https://bipaa.genouest.org/sp/acyrtosiphon\\_pisum/](https://bipaa.genouest.org/sp/acyrtosiphon_pisum/)). Results showed that  
109 56.9% (11,170/19,642) of *E. onukii* genes had homologs (Figure 1B). The *E. onukii*  
110 genome contained ~37.7% repetitive sequences, a relatively moderate level among  
111 published Hemiptera genomes, which repetitive sequences range from ~12% in *D.*  
112 *noxia* [12] to 56.5% in *C. lectularius* [9]. TEs accounted for approximately 32.8% of  
113 the *E. onukii* genome, and were comprised of 12.82% transposon sequences, 4% long  
114 terminal repeats (LTRs), 11.24% long interspersed nuclear elements (LINEs), 2.20%  
115 short interspersed nuclear elements (SINEs) (Table S8). TE level in *E. onukii* was  
116 comparable to that of *N. lugens* [15], but approximately 1.5 times higher than *A.*  
117 *glycines* [10] (Figure 1C). Similar to the aphid genome, LINEs were more prevalent  
118 than LTR retroelements (Table S8). The moderate genome size and levels of repetitive  
119 sequences in *E. onukii* compared to other hemipteran species (Figure 1C; Figure S3B)  
120 indicated that TEs and other non-coding DNA might contribute to variation in genome  
121 size [16]. The genome sizes of insect generally result from changes in the repetitive  
122 DNA content [16]. Therefore, we calculated the correlation between repetitive  
123 sequence content and genome size in sequenced insect species from both the  
124 Holometabola (e.g., flies, beetles, wasps, and butterflies) and Hemimetabola (e.g.,  
125 aphids, true bugs, blood-feeding bugs, and leafhoppers). As expected, the genome size  
126 was highly correlated with the DNA repetitive content (Spearman test,  $r = 0.8$ ,  $P =$   
127  $0.0004$ ) (Figure S3B). Previous studies suggest that differences in DNA repeat content  
128 are likely due to TE variation or the influence of stochastic population effects [17].

129 We used OrthoFinder to identify orthologous genes across the genomes of *E.*  
130 *onukii* and other 18 insect species covering six different insect orders (Hemiptera,  
131 Isoptera, Hymenoptera, Coleoptera, Diptera and Lepidoptera). A total of 196

132 single-copy orthologous genes, 6411 multi-copied orthologous genes, 18 unique  
133 paralogous genes and 3325 unclustered genes were identified. The phylogenetic  
134 relationships among 19 sequenced insect species were analyzed using the  
135 PROTGAMMALGX model in RAxML [18] based on the 196 single-copy  
136 orthologous genes (Figure 1C). Based on these analyses, *E. onukii* was estimated to  
137 have diverged from *N. lugens* and *L. striatellus* approximately 175 Mya ago (Figure  
138 S4).

139       Expansion and contraction of gene families were analyzed based on 19 species.  
140 Results showed that both total and species-specific genes in Hemiptera genomes  
141 increased relative to other insect orders (Figure S4) [15]. We identified 2,859 novel  
142 genes (species-specific) in *E. onukii*, representing about 14.5% of the genome. In  
143 addition, 1178 expanded gene families were detected and these gene families were  
144 over-represented in specific Gene Ontology (GO) terms, including carboxylic ester  
145 hydrolase activity, zinc ion binding, iron ion binding, and transmembrane transporter  
146 activity (Table S9). The *E. onukii* genome contained 3880 contracted genes families  
147 (Figure S4). For example, functional analysis revealed that these genes were involved  
148 in immunity (immunoglobulins), myosin, and tropomyosin (Table S10). These *E.*  
149 *onukii*-specific gene family expansions and contractions were likely involved in  
150 evolutionary adaption to tea phloem sap, symbiotic dependence, pathogen immunity,  
151 and environmental conditions such as ecological and climatic variation, and tea  
152 variety differences. For example, evidence shows carboxylic ester hydrolase activity  
153 is involved in sap-sucking insects (e.g., *M. persicae* and *S. graminum*) sequestering  
154 OP insecticides [19]. Immunoglobulin superfamily proteins have been reported as  
155 candidates for synapse targeting functions related to synaptic specificity in the visual  
156 system in *Drosophila* [20, 21].

### 157 **Genomic adaptation to chemoreception and detoxification**

158       The chemosensory system is essential for herbivorous insects to orient toward  
159 and locate potential host plants [22], potentially indicating how herbivorous insects  
160 adapt to host changes. Environmental signals and chemosensory stimuli are

161 recognized and transduced by several multi-gene families including olfactory  
162 receptors (ORs), ionotropic receptors (IRs), gustatory receptors (GRs),  
163 odorant-binding proteins (OBPs), and chemosensory proteins (CSPs) [22, 23]. To  
164 examine genes linked to chemosensory stimuli recognition, we manually annotated  
165 several related gene families, including 20 olfactory receptors (ORs), 23 ionotropic  
166 receptors (IRs), 12 gustatory receptors (GRs), 5 odorant-binding proteins (OBPs), and  
167 26 chemosensory proteins (CSPs) (**Table 3**).

168 Comparative analysis of genomes across different species revealed an increased  
169 number of CSPs in the *E. onukii* genome (Table 3, **Figure 2A** and **B**, and Table S11).  
170 The phylogenetic analysis of Hemiptera identified 10 homologous subgroups of CSPs  
171 (CSP1-CSP10) (Figure 2B), which was consistent with a previous study [24]. Other  
172 than CSP5 and CSP6, *E. onukii* CSPs were present in seven of the ten clades,  
173 indicating these genes are highly conserved across the Hemiptera. Interestingly, we  
174 found obvious expansion of some subgroups in *E. onukii* (e.g., CSP3, CSP4, CSP8,  
175 and CSP9) and these CSPs were unevenly distributed over 4 of the 10 chromosomes,  
176 with enrichment on chromosome 1 (Fisher exact test,  $P$  value < 0.00001; Figure 2C).  
177 Most CSP genes were distributed in expanded clusters on chromosomes, likely  
178 through a series of gene duplication events (Figure 2C). Meanwhile, several CSPs  
179 were highly expressed across different life cycle stages (Figure S5A), implying an  
180 important role in the growth and development of *E. onukii*. Earlier studies on CSP  
181 functions [25, 26], coupled with our observations of conserved phylogeny in  
182 Hemiptera species and species-specific expansion of CSPs, indicate that CSPs are  
183 crucial for recognition of tea volatiles and location of potential host tea plants. We  
184 suggest that *E. onukii* requires many CSPs to specifically detect the complex  
185 molecular components of odors from different tea cultivars. Thus, our analyses  
186 highlighted directions for further experimental analysis of genes linked to host  
187 adaptation. Toward this goal, functional testing of CSPs might identify genes that  
188 were responsible for detection of specific tea cultivars by *E. onukii*.

189 Our investigation of the chemoreceptor-related genes showed relatively low  
190 numbers of ORs, IRs, GRs and OBPs in *E. onukii* (Table 3; Table S11; Figure S5-8).  
191 For example, we found that the number of OBPs in Hemiptera species was lower than  
192 other insect orders (Figure S5B), suggesting conservation of odorant molecular  
193 transport in Hemiptera [27]. Other chemoreceptor genes, including ORs, GRs and IRs,  
194 play important roles in local adaption by responding to chemical signals with neuronal  
195 activity [15]. The species-specific expansion OR clade of gene family was obvious in  
196 our analysis (Figure S6). Polyphagous insects (e.g., *P. americana*) possess more OR  
197 genes than monophagous insects (e.g., *E. onukii*) (Table 3; Table S11; Figure S6). This  
198 might have resulted from specific evolutionary adaption to food selection and  
199 detection since genetic diversity of ORs allows insects to bind to a greater range of  
200 ligands [28]. In addition, similar to *N. lugens*, *E. onukii* had a substantially lower  
201 number of GRs (Table 3, Figure S7). Earlier studies show a close relationship  
202 between GRs and insect herbivory, with lower number of GRs in specialists than in  
203 generalists [29, 30]. Another explanation may be that antennae of leafhoppers have a  
204 much simpler structure with fewer sensilla than those of planthoppers (e.g., *N. lugens*)  
205 and aphids. TGL also possessed fewer IRs (Table 3; Table S11; Figure S8), which  
206 mediate synaptic communication in insects and mediates responses to volatile  
207 chemicals in *D. melanogaster* [31, 32]. We believed that the numerical reduction in  
208 ORs, IRs, GRs and OBPs might be associated with the adaptive evolution to a  
209 monophagous diet of tea phloem sap, and the substantial expansion of CSPs might  
210 contribute to tea volatile perception in *E. onukii*.

211 *E. onukii* is believed to have experienced rapid evolution leading to insecticide  
212 resistance in natural populations [33]. Four classic gene families commonly  
213 associated with detoxification of xenobiotics and insecticides, including P450, COEs,  
214 GSTs and ABCs, were therefore investigated. We identified 103 cytochrome P450s,  
215 29 ATP-binding cassette transporters (ABC transporters), 77 carboxylesterases  
216 (COEs), and 30 glutathione S-transferases (GSTs) (Table 3). Similar to other  
217 insecticide resistant pests [34], we found that the P450 gene family was expanded,



218 mainly in CYP3 and CYP4 clans (Table 3; Table S12; Figure 2D; Figure S9A). Based  
219 on our RNA-seq data, 28 CYP3 and 38 CYP4 genes showed expression (FPKM > 1.0)  
220 with 20 in CYP3 and 16 in CYP4 being highly expressed during at least one  
221 developmental stage (FPKM > 10.0) (Figure 2D; Figure S9B). The results underlined  
222 their potential function of detoxifying the xenobiotics or insecticides in TGL.

223 We tracked the expression patterns of these genes in TGL samples collected from  
224 different tea cultivars, with four cultivars being resistant and four cultivars susceptible  
225 to TGL according to previous studies [35]. Results showed that 17 CYP3 and 12  
226 CYP4 genes were highly expressed ( $\text{Log}_2^{\text{FPKM}} > 10.0$ ) but not differentiated in both  
227 resistant and susceptible tea cultivars (Figure 2D; Figure S9C). Thus, we speculated  
228 that CYP genes might be involved in metabolism of common xenobiotics, or their  
229 expression may be induced by insecticides. Indeed, previous studies have shown that  
230 CYP3s are involved in xenobiotic metabolism and insecticide resistance, with some  
231 family members being inducible by pesticides or plant secondary metabolites [36].  
232 CYP4s are known to encode constitutive and inducible enzymes related to odorant  
233 and pheromone metabolism, and expression can be induced by xenobiotics [37].

#### 234 **Niche under adaptive selection are related to metabolic regulation and** 235 **detoxification**

236 *E. onukii* samples were collected from four tea-growing regions around China:  
237 southwest region (SWR), south of the Yangtze River region (SYR), north of the  
238 Yangtze River region (NYR), and south China region (SER), and these samples were  
239 re-sequenced with a depth ranging from 20.8× to 30.7× at whole genome level (Table  
240 S13). After filtering the low-quality variants, we generated a genomic dataset  
241 containing 12,271,501 high-quality SNPs (Table S13) to estimate the genomic  
242 signatures of evolutionary adaptation for *E. onukii*, based on Tajima's *D* with a 50-kb  
243 window size and a fixed step length of 10 kb. Totally 369 sliding windows, covering  
244 18.45 Mb genomic sequences (Table S14) and containing 82 protein-coding genes  
245 (Table S15) were detected, including seven genes (Table S16) under purifying

246 selection and 79 under balancing selection (**Figure 3A**).

247 Purifying selection is important in shaping genomic diversity in natural  
248 populations and is essential to preserving biological functions at selection sites [38].  
249 Almost all these genes are related to nervous system or visual functions. For instance,  
250 forkhead box protein P1 (*FOXP1*) is a transcription factor with a regulatory function  
251 in the central nervous system (CNS), and mutations in this gene have been linked to  
252 various neurodevelopmental diseases, including autism, cognitive abnormalities,  
253 intellectual disabilities and speech defects [39]. Coronin 6 is highly enriched at the  
254 adult neuromuscular junction and can regulate acetylcholine receptor  
255 (neurotransmitter receptor) clusters by modulating interactions between the actin  
256 cytoskeletal network and receptors [40]. In mice lacking *SZT2*, mTORC1 signaling is  
257 hyperactive in several tissues including neurons in the brain, and these components  
258 have been linked to neurological disease [17]. The nucleoredoxin-like 1 (*Nxn1l*) gene  
259 has two alternative splice isoforms: a rod-derived cone viability factor that functions  
260 in the retina [41]. Inositol hexakisphosphate, the nonvisual arrestin oligomerization  
261 and cellular localization are modulated by its binding [42]. In insects, detection of  
262 light changes, vibration, colors and semiochemicals, which have evolutionarily old  
263 sensory functions, are vital for behaviors including avoiding predation, food location  
264 and intraspecific communication. Thus, we speculated that these genes under  
265 purifying selection would be important for nervous or visual functions in *E. onukii*.

266 We found that 91.8% of the selected genes (79/86) were under balancing  
267 selection with positive Tajima's *D* values that greatly deviated from zero, indicating  
268 that the populations of *E. onukii* maintained a high level of polymorphism. A much  
269 higher genetic diversity ( $\pi = 0.00804$ ) was observed in those genomic regions under  
270 balancing selection compared to genome-wide diversity ( $P < 0.0001$ , T-test),  
271 suggesting a strong capacity for *E. onukii* to rapidly adapt to diverse habitats [43]. GO  
272 enrichment analysis showed that these genes were enriched in several biological  
273 processes including cell periphery, plasma membrane part, transmembrane transport,

274 ion binding, anion binding, and nucleoside-triphosphatase activity (Figure S10; Table  
275 S17). KEGG enrichment analyses pointed to several pathways including those linked  
276 to metabolism, circadian rhythms, and immune system functions.

277       Based on KEGG analyses, lysine succinylation and glutarylation pathways were  
278 enriched (Figure 3B). Previous studies have reported that protein acetylation plays  
279 critical roles in cellular processes ranging from gene expression to metabolism [44].  
280 Lysine succinylation is a recently identified post-translational modification (PTM)  
281 [45]. It is important for metabolism and detoxification in *B. mori* [45]. In our study,  
282 the apoptosis pathway was consistently enriched (Figure S11). Studies in Lepidoptera  
283 insects suggest that apoptosis plays a vital role in resistance to virus infection and  
284 some apoptosis-related proteins are known to be succinylated [40, 46, 47]. Here, we  
285 identified four key genes, including *rve*, *Pyridoxal\_deC* and two *Glyco\_transf\_22*,  
286 which were functionally present in lysine succinylation and glutarylation pathways  
287 (Figure 3B).

288       Lysine succinylation is important for virus-infection resistance and detoxification  
289 in insects [44-46, 48, 49]. To examine whether the selected pathways in *E. onukii* had  
290 similar functions, we analyzed the expression patterns of four genes, *rve*,  
291 *Pyridoxal\_deC* and two *Glyco\_transf\_22*, collected from 11 different tea cultivars  
292 including 4 cultivars (LongJ, DeQ, JianD, JuY) showing resistance to *E. onukii* and 4  
293 cultivars (ZhuS, LanT, BanZ, EnB) showing susceptibility to *E. onukii*. Based on  
294 RNA-Seq analysis, two genes (*Pyridoxal\_deC*, *Glyco\_transf\_22*) showed  
295 significantly high expression in both susceptible and resistant tea cultivars, but with  
296 different patterns (Figure 3C) ( $P < 0.05$ , T-test). *Pyridoxal\_deC* and *Glyco\_transf\_22*  
297 were key genes in metabolic regulation of succinyl- and glutaryl-CoAs (Figure 3B).  
298 These results, together with the previously reported roles of succinylation and  
299 glutarylation in other insects [44-46, 49], indicated that genes under balancing  
300 selection could be involved in metabolic regulation and detoxification of *E. onukii*,  
301 possibly contributing to its success in adapting to a wide range of tea cultivars grown

302 in ecologically diverse regions of China.

303 *E. onukii* is largely controlled using insecticides in China, leading to  
304 development of resistance to chemicals. The ATP-binding cassette (ABC) transporters  
305 are conserved across insects and have been implicated in insecticide resistance among  
306 pest species [50]. Based on our analyses, the ABC superfamily showed no expansion,  
307 and few orthologs were present in *E. onukii* compared to other insect species (Table 3).  
308 However, we identified four ABC transporter genes that showed signatures of  
309 balancing selection and thus maintaining high genetic variation within populations of  
310 *E. onukii*. Further analysis showed that these four genes belonged to three ABC  
311 subfamilies including ABCG, ABCB, and ABCA. Balancing selection favors defense  
312 proteins with functions in resistance, immunity and adaptations [51, 52]. However, the  
313 functions of these four genes have not been elucidated in leafhoppers or aphids.  
314 Studies in other animals or insects have shown that these subfamilies are closely  
315 related to drug or insecticide resistance [53, 54, 55]. A comparative analysis between  
316 susceptible and resistant strains of *A. aegypti* reports that the genes of ABC  
317 transporter G family are highly up-regulated [54]. Similar studies have also been  
318 carried out in *P. xylostella* and *L. striatellus*, showing that ABCA/B/G subfamilies are  
319 significantly over-expressed in the resistant strains [55, 56]. Based on ABC family  
320 functions in other insects, we hypothesized that *E. onukii* ABC genes might contribute  
321 to its adaptation to different tea cultivars. This hypothesis may be supported by a  
322 study of Cry1Ac resistance in *P. xylostella* [53]. We therefore investigated the  
323 expression patterns of the four genes using *E. onukii* samples collected from 11  
324 different tea cultivars, as described above. These genes showed moderate expression  
325 levels across different developmental stages (Figure S12A) and samples of *E. onukii*  
326 from different tea cultivars (Figure S12B), suggesting that these ABC superfamily  
327 members could broadly contribute to adaptation to various tea cultivars and even  
328 possibly to chemical resistance. Previous studies also suggest that ABC transporters  
329 are not strictly specific to certain chemicals, implying that ABC transporters have a  
330 broad spectrum of chemical substrates and may act as a basis for cross-resistance of

331 multiple chemicals [55].

332 Genomic regions under balancing selection are functionally important because of  
333 their high genetic diversity contributing to adaptation to environmental change [43].  
334 Based on our results, we hypothesized that balancing selection might have contributed  
335 to the high level of polymorphism in *E. onukii* populations, facilitating adaptation to  
336 diverse environments and tea cultivars.

### 337 **Evolutionary history is inconsistent between TGL and tea cultivars**

338 We used high-quality SNPs obtained from the 54 *E. onukii* samples coming from  
339 the different tea-growing regions (**Figure 4A**) in China (Table S13) to profile their  
340 phylogeographical relationships. Phylogenetic analysis and network estimation of the  
341 *E. onukii* samples with *E. flavescens* and *Asymmetrasca* sp. as outgroups uncovered  
342 three geographically clustered groups (Groups I-III; Figure 4B and Figure S13).  
343 Group I contained 4 samples collected from Yunnan province, being the closest to the  
344 outgroups. Group II included 28 samples mainly collected from eastern China,  
345 including Shandong, Jiangsu, Zhejiang, and Anhui provinces. The remaining 22  
346 samples (i.e., Group III) were mainly from 13 provinces of central and southern China  
347 (Figure 4B and **Table 4**). These results were further supported by genetic structure  
348 analysis ( $K = 3$ ) based on the Admixture model (Figure 4C and Figure S14) [57].  
349 Three clustered groups of *E. onukii* samples (Figure 4B; Table 4) were inconsistent  
350 with the current division of the four tea-growing regions (Figure 4A) based on the tea  
351 growing history, geographical locations, and tea cultivars [58]. These results suggest a  
352 different evolutionary history of *E. onukii* among these regions. Our analyses of  
353 phylogenetic and genetic structure confirmed the genetic differences between group I  
354 (samples from Yunnan) and the other groups, as shown in a previous study based on  
355 microsatellites [5]. However, this previous study suggested four main genetic groups  
356 ( $K = 4$ ) [5]. This may be because the present study collected much more samples  
357 around China (54 locations in 22 provinces) than the other one (22 19 locations in 13  
358 provinces) and used a greater number of genetic markers (whole-genome SNPs vs.

359 microsatellite markers). We observed that individuals from different groups were  
360 interspersed (Figures 4B and C), possibly reflecting gene flow across location, as  
361 observed in the previous study [5].

362 To investigate the genetic divergence, we calculated the average pairwise  
363 diversity ( $\pi$ ) within each of the clustered groups (Table 4). Comparably higher levels  
364 of genetic diversity (0.004662 and 0.004744) were observed in Groups II and III than  
365 in Group I (0.004062). The high genetic diversity of eastern China and  
366 southern-central China may be explained by a geographically wide range and  
367 ecologically diverse tea-growing conditions. Further, we found a higher genetic  
368 diversity in certain subgroups within the major tea-growing provinces of eastern  
369 China and southern-central China. The diversity ( $\pi = 0.0048$ ) in Jiangsu and Zhejiang  
370 provinces was higher than the overall diversity of eastern China. and similarly, a  
371 higher diversity ( $\pi = 0.004939$ ) was found in Anhui and Fujian provinces than in  
372 southern-central China, indicating the genetic diversity in these locations. We further  
373 analyzed the population differentiation ( $F_{ST}$ ) across different geographically clustered  
374 groups and showed a very low  $F_{ST}$  value (0.005902) between Group II and III,  
375 indicating their genetically close relationship. In contrast, the  $F_{ST}$  values between  
376 Group I and Group II or III were much higher (0.052321 in Group II vs. Group I;  
377 0.043225 in Group III vs. Group I), suggesting that the samples from Yunnan  
378 province were genetically distant from the populations in eastern China and  
379 southern-central China.

380 A previous study reports that the structure of male genitalia varies among *E.*  
381 *onukii* locations from eastern China, southern-central China and Yunnan province [3].  
382 Our population genetic analysis also showed genetic differences among these  
383 different groups (Figure 4). We speculated that some geographical barriers might have  
384 restricted gene flow leading to these differences. Yunnan is surrounded by mountains  
385 and rivers as a result of an uplift during the Quaternary and is isolated by the steep  
386 Hengduan Mountains. Unlike the clonal propagation of tea cultivars in other regions  
387 of China, tea cultivation in Yunnan has depended on seeds from early times [59]. This

388 might have prevented the interbreeding of local *E. onukii* populations with  
389 populations from other regions. Similarly, the hilly region between Zhejiang and  
390 Fujian might separate *E. onukii* populations, leading to populations genetically  
391 different (Figure 4).

## 392 **Conclusions**

393 In this project, we develop a high-quality chromosome-level genome with 92.7%  
394 BUSCO completeness for *E. onukii*, a species of crucial importance to a widely  
395 consumed crop linked to human health. Based on genomic profiling and comparison,  
396 we find complex patterns of genomic variation and expansion of gene families  
397 associated with evolutionary adaptation to chemosensory reception and xenobiotic  
398 detoxification. We identify genomic signatures of balancing selection to reveal the  
399 high genetic diversity of resistant genes, underlining their important roles in the  
400 adaptive evolution of *E. onukii*. Further, we analyze patterns of variation in genomic  
401 sequences from 54 samples and two outgroups, uncovering the population structure  
402 and evolutionary history of *E. onukii* across the four different tea-growing regions of  
403 China. This work will facilitate functional studies on the adaption of this pest to  
404 ecologically diverse habitats, and provide the genomic resources and genetic  
405 knowledge for development of sustainable pest management strategy.

## 406 **Materials and Methods**

407 **Insect colony.** *E. onukii* samples were collected in Fuzhou, Fujian province,  
408 southeastern China in July 2017 (on the tea cultivar of Huangdan), and then  
409 maintained on tea plants in the laboratory. The insectarium environment was set at 28  
410  $\pm 1^\circ\text{C}$  and  $60 \pm 5\%$  RH with a photoperiod (light: dark = 12:12).

411 **Genome sequencing and assembly.** Since the quality of *de novo* assembly is  
412 sensitive to genomic heterozygosity, genomic DNA of adults was extracted from  
413 insects after 12 generations of laboratory inbreeding. Chromosome-level assembly

414 was performed using Nanopore (Oxford Nanopore Technologies, ONT) with  
415 chromatin conformation capture (Hi-C) technologies. The raw ONT reads were  
416 self-corrected using CANU version 1.7 [61] with parameter corOutCoverage = 100,  
417 and corrected reads were subject to two widely-used long-read assemblers, wtdbg2  
418 [62] and SMARTdenovo (<https://github.com/ruanjue/smartdenovo>). These two  
419 assemblers applied the homopolymer compressed (HPC) k-mer indexing algorithm for  
420 sequence alignment and assembly, making the heterozygous regions prone to  
421 collapsing. To improve the contiguity of contig assemblies, we used Quickmerge [63]  
422 to reconcile wtdbg2 and SMARTdenovo assemblies. Each round of assemblies was  
423 inspected through evaluation of N50s based on assembled genome size as well as  
424 complete/duplicated BUSCO ratio (Table S3), showing 92.7% completeness and only  
425 2.7% duplication. It also indicated that the redundant sequences were well-handled in  
426 our assembly. The total length of the final contig assembly for *E. onukii* genome was  
427 599 Mb with a contig N50 size of 2.2 Mb. Illumina short reads were then used to  
428 polish the ONT assembled genome by Pilon [60] with the following parameters:  
429 --diploid --threads 6 --changes --tracks --fix bases --verbose --mindepth 4. Hi-C  
430 libraries were created from nymphs as previously described [34]. The original  
431 cross-linked fragments, also known as chimeric fragments, were then processed into  
432 paired-end sequencing libraries and sequenced on the Illumina HiSeq X-10 platform.  
433 Paired-end reads were uniquely mapped onto the draft assembly, then 3D-DNA  
434 pipeline [64] was recruited to correct any mis-joined contigs by detecting abrupt  
435 long-range contact patterns. The Hi-C corrected contigs were further linked into 10  
436 pseudo-chromosomes using the ALLHiC pipeline [65]. In total, we generated 65 Gb  
437 data (~109×) sequences for one cell by for Nanopore ONT and 37 Gb clean data  
438 (~61×) of Illumina X-10 from polishing (**Table 1S**).

439 **Official gene set annotation.** Annotation of protein-coding genes was based on *ab*  
440 *initio* gene predictions, transcript evidence and homologous protein evidence, which  
441 was all implemented in the GEMOMA computational pipeline [66]. RNA-seq data  
442 were generated from every developmental stage (egg, 1st – 5th nymph instar and



443 adult). Besides, multiple studies have shown that resistance to *E. onukii* varies with  
444 different tea cultivars [35, 67]. *E. onukii* samples were collected from 11 main tea  
445 cultivars in China, of which four were susceptible to *E. onukii* (ZhuS, LanT, BanZ and  
446 EnB), four were resistant (LongJ, DeQ, JianD, JuY), and three had unknown  
447 resistance status (SuC, ZiD and ZhongC) [35]. RNA-seq reads were first trimmed  
448 using the Trimmomatic program [68] and then mapped to the reference genome using  
449 HiSAT2 [69]. During homolog-based prediction, the protein sequences of *Drosophila*  
450 *melanogaster*, *Apis mellifera*, *Myzus persicae*, *Acyrtosiphon pisum*, *Tribolium*  
451 *castaneum*, and *Bombyx mori* were downloaded and aligned to the reference assembly  
452 using TBLASTN with e-value  $1e^{-5}$ , and the resulting alignment files were subject to  
453 GEMOMA annotation.

454 **Orthology and phylogenomics.** A total of 19 representative insect species including  
455 *E. onukii* were collected for orthology and phylogenetic analyses (**Figure 1**). A  
456 phylogenetic tree based on a concatenated sequence alignment of the single-copy  
457 gene families from *E. onukii* and other insect species was constructed. We identified  
458 5,736 single copy genes in these insect genomes using OrthoFinder (version 2.0.0)  
459 [70] and performed multiple alignments of the single copy genes from the selected  
460 genomes using MAFFT v7.299b [71]. Based on a concatenated sequence alignment, a  
461 phylogenetic tree was constructed using RAxML software and the  
462 PROTGAMMALGX model [18]. Divergence times of the selected insect species  
463 were calculated by PAMLv4.8a mcmcTREE [72]. The Markov chain Monte Carlo  
464 (MCMC) was run for 1,000,000 iterations using a sample frequency of 100 after a  
465 burn-in of 2,000 iterations, with the other parameters set as defaults. The following  
466 constraints were used for time calibrations: *D. melanogaster* and *A. mellifera*  
467 divergence time (42.8-83.4 million years ago) [73]. FigTree v1.44 was used to  
468 visualize the phylogenetic tree. Gene family expansion and contraction analyses were  
469 performed using Café v4.0.1 [74].

470 **Gene families.** Some gene families with functional importance were selected for

471 manual annotation based on the high-quality assembly. Most gene families were  
472 annotated using known models from previously annotated genomes including *D.*  
473 *melanogaster*, *A. mellifera*, *M. persicae*, *A. pisum*, *C. lectularius* and *B. mori*. Some  
474 gene families, which were difficult to identify from automated predictions, were  
475 identified based on iterative searching. In brief, BLASTP searches for Hemiptera  
476 homologs used queries to search the genomic loci for significant hits ( $e < 10^{-3}$ ).  
477 Further, we recruited hidden Markov models (HMMs) to identify certain domains for  
478 these selected gene families based on pfam\_scan [75]. Multiple sequence alignments  
479 of the selected gene families were obtained with MUSCLE [76] and corrected  
480 manually. Phylogenetic analysis was conducted using ML and NJ models, and  
481 implemented in MEGA7 for 500 bootstraps [77].

482 **Differential gene expression.** RNA-seq data were generated from seven  
483 developmental stages (egg, 1<sup>st</sup> – 5<sup>th</sup> nymph instars and adult) and the 11 populations  
484 of *E. onukii* collected from different tea cultivars (described in Official gene set  
485 annotation section). The RNA-seq reads were trimmed using the Trimmomatic  
486 program [68] and mapped back to gene models using bowtie [78]. FPKM was  
487 calculated based on the RSEM program [79] implanted in Trinity software [80].  
488 Significantly differentially expressed genes were detected with a cutoff ( $P < 0.05$  and  
489  $\log_2^{\text{(change fold)}} > |1|$ ) [81].

490 **Sample collection, resequencing and SNP calling.** Individuals of *E. onukii* (between  
491 100 and 120) were collected from 54 plantations distributed in four tea-growing  
492 regions of China: Southwest region (SWR), South of the Yangtze River region (SYR),  
493 North of the Yangtze River region (NYR), and South China region (SER) (**Table S13**).  
494 We also collected two samples, *E. flavescens* (collected from Canada in vineyards)  
495 and *Asymmetrasca* sp. (collected from Africa), as outgroups (Table S13). For DNA  
496 extraction, 50 to 100 individuals were mixed. Genomic DNA extraction, library  
497 construction and amplification were performed following standard protocols  
498 (Supplemental Notes). All samples were sequenced using the Illumina X-10 platform

499 with a paired-end read length of 150 bp. The GATK toolkit (version: V  
500 3.5-0-g36282e4) [82] and samtools/bcftools [83] were used to detect variants and  
501 SNPs following a series of filtering steps as detailed in a Supplemental Note.

502 **Maximum-likelihood tree inference.** The phylogenetic tree was built based on SNPs  
503 of single-copy genes. The heterozygous and homozygous SNPs were included in the  
504 construction of ML tree. For the heterozygous SNPs, the major alleles that had more  
505 reads supported than the minor alleles were retained for further analysis. These SNPs  
506 were converted to phylip and aligned in fasta format. The ML (maximum likelihood)  
507 tree was constructed using IQ-Tree with a self-estimated best substitution model [84].

508 **Admixture analysis.** Ancestral population stratification among the re-sequenced TGL  
509 populations was inferred using Admixture software [85]. We estimated the optimal  
510 ancestral population structure using ancestral population sizes  $K = 1 - 4$  and estimated  
511 parameter standard errors based on bootstrapping of 2000.

512 **Diversity statistics.** VCFtools v 0.1.3 [86] was used to calculate population diversity  
513 statistics. Genetic differentiation ( $F_{ST}$ ) and the average pairwise diversity index ( $\pi$ )  
514 were estimated based on a sliding window analysis with 100 kb window size and 50  
515 kb step size.

516 **Scanning loci under selective sweeps.** To identify candidate genes responsible for  
517 reciprocal selection in the TGL populations, we performed the Tajima's  $D$  test to  
518 identify selective sweeps. Loci with Tajima's  $D$  that greatly deviated from 0 proved to  
519 be a selection niche in the genome. The Tajima's  $D$  statistics were calculated using  
520 VCFtools program with a 50 kb window size and 10 kb step size. A negative Tajima's  
521  $D$  indicates population size expansion and/or purifying selection. A significantly  
522 positive Tajima's  $D$  signifies low levels of low and high frequency polymorphisms,  
523 indicating a decrease in population size and/or balancing selection [87]. We used the  
524 empirical 5% windows to indicate the significance. The lowest 5% windows were  
525 considered as purifying selection and the highest 5% were considered as balancing

526 selection.

527 Based on the annotation of our high-quality genome, candidate genes were identified  
528 using our outliers. GO annotation was conducted using Blast2GO [88] and the KEGG  
529 pathway analysis was performed using OmicShare tools ([www.omicshare.com/tools](http://www.omicshare.com/tools)).

530

### 531 **Data availability**

532 The genome sequences and re-sequencing reads have been deposited in NCBI with  
533 accession number of PRJNA731240 and GSA database  
534 (<https://ngdc.cncb.ac.cn/search/?dbId=gsa&q=Empoasca>) with the accession number  
535 of GWHBAZN00000000. Reads for RNA-seq was deposited in GSA database with  
536 the accession number of PRJCA005189. The mitochondrial sequence reported in this  
537 paper have been deposited in the Genome Warehouse in National Genomics Data  
538 Center with the accession number GWHBFSP000000000 that is publicly accessible at  
539 <https://ngdc.cncb.ac.cn/gwh>.

### 540 **CRedit author statement**

541 **Qian Zhao:** Investigation, Methodology, Formal analysis, Visualization, Writing –  
542 original draft, Writing – review & editing. **Longqing Shi:** Resources, Methodology,  
543 Writing – original draft. **Weiyi He:** Methodology, Writing - review & editing. **Jinyu**  
544 **Li:** Resources, Formal analysis. **Shijun You:** Resources, Data curation. **Shuai Chen:**  
545 Formal analysis. **Jing Lin:** Visualization, Formal analysis. **Yibin Wang:** Formal  
546 analysis. **Liwen Zhang:** Visualization. **Guang Yang:** Resources, Writing - review &  
547 editing. **Liette Vasseur:** Resources, Writing - review & editing. **Minsheng You:**  
548 Conceptualization, Methodology, Resources, Writing - original draft, Writing - review  
549 & editing, Supervision. All authors read and approved the final manuscript.

### 550 **Competing interests**

551 The authors declare that they have no competing interests.

### 552 **Acknowledgements**

553 This work was supported by The National Key R & D Program of China  
554 (2019YFD1002100), Fujian Agriculture and Forestry University Construction Project  
555 for Technological Innovation and Service System of Tea Industry Chain  
556 (K1520005A03) and Key International Science and Technology cooperation Project  
557 of China (2016YFE0102100). We thank Mr. Haifang He, and Fasheng Huang for their  
558 kind assistance in collection of the insect samples.

559 **ORCID**

560 0000-0003-4256-5686 (Qian Zhao)  
561 0000-0003-2036-7558 (Longqing Shi)  
562 0000-0001-8659-3123 (Weiyi He)  
563 0000-0003-4560-3190 (Jinyu Li)  
564 0000-0001-7340-1524 (Shijun You)  
565 0000-0002-6861-2682 (Shuai Chen)  
566 0000-0002-5913-1801 (Jing Lin)  
567 0000-0002-0781-3966 (Yibin Wang)  
568 0000-0001-9220-3849 (Liwenzhang)  
569 0000-0002-3250-5228 (Guang Yang)  
570 0000-0001-7289-2675 (Liette Vasseur)  
571 0000-0001-9042-6432 (Minsheng You)

## 572 **References**

- 573 [1] Fu JY, Han BY and Xiao Q. Mitochondrial COI and 16sRNA Evidence for a Single Species  
574 Hypothesis of *E. vitis*, *J. formosana* and *E. onukii* in East Asia. PLoS One 2014; 9(12): p.  
575 e115259.
- 576 [2] Chen LL, Yuan P, Pozsgai G, Chen P, Zhu H and You MS. The impact of cover crops on the  
577 predatory mite *Anystis baccarum* (Acari, Anystidae) and the leafhopper pest *Empoasca onukii*  
578 (Hemiptera, Cicadellidae) in a tea plantation. Pest Manag Sci 2019; 75(12): p. 3371-3380.
- 579 [3] Qin D, Zhang L, Xiao Q, Dietrich C and Matsumura M. Clarification of the Identity of the Tea  
580 Green Leafhopper Based on Morphological Comparison between Chinese and Japanese  
581 Specimens. PLoS One 2015; 10(9): p. e0139202.
- 582 [4] Lv WM, Chen X and Luo QR. Research on occurrence and control of *Empoasca flavescens*.  
583 Journal of Tea Science 1964: p. 45-55.
- 584 [5] Zhang L, Wang F, Qiao L, Dietrich CH, Matsumura M and Qin D. Population structure and  
585 genetic differentiation of tea green leafhopper, *Empoasca (Matsumurasca) onukii*, in China based  
586 on microsatellite markers. Sci Rep 2019; 9(1): p. 1202.
- 587 [6] Xiao Z, Huang X, Zang Z and Yang H. Spatio-temporal variation and the driving forces of tea  
588 production in China over the last 30 years. J. Geogr. Sci 2018; 28: p. 275-290.
- 589 [7] Panfilio KA, Vargas Jentsch IM, Benoit JB, Erezyilmaz D, Suzuki Y, Colella S, et al.  
590 Molecular evolutionary trends and feeding ecology diversification in the Hemiptera, anchored by  
591 the milkweed bug genome. Genome Biol 2019; 20(1): p. 64.
- 592 [8] Jin S, Sun X, Chen Z and Xiao B. Resistance of the tea green leafhopper to different tea plant  
593 varieties. Sci. Agric. Sin 2012; 45(2): p. 255-265.
- 594 [9] Rosenfeld JA, Reeves D, Brugler MR, Narechania A, Simon S, Durrett R, et al. Genome  
595 assembly and geospatial phylogenomics of the bed bug *Cimex lectularius*. Nat Commun 2016; 7:  
596 p. 10164.
- 597 [10] J. A. Wenger, B. J. Cassone, F. Legeai, J. S. Johnston, R. Bansal, A. D. Yates, et al. Whole  
598 genome sequence of the soybean aphid, *Aphis glycines*. Insect Biochem Mol Biol 2017.
- 599 [11] Ou S, Chen J and Jiang N. Assessing genome assembly quality using the LTR Assembly  
600 Index (LAI). Nucleic Acids Res 2018; 46(21): p. e126.

- 601 [12] Nicholson SJ, Nickerson ML, Dean M, Song Y, Hoyt PR, Rhee H, et al. The genome of  
602 *Diuraphis noxia*, a global aphid pest of small grains. *BMC Genomics* 2015; 16: p. 429.
- 603 [13] Li Y, Park H, Smith TE and Moran NA. Gene Family Evolution in the Pea Aphid Based on  
604 Chromosome-Level Genome Assembly. *Mol Biol Evol* 2019; 36(10): p. 2143-2156.
- 605 [14] Ye YX, Zhang HH, Li DT, Zhuo JC, Shen Y, Hu QL, et al. Chromosome-level assembly of  
606 the brown planthopper genome with a characterized Y chromosome. *Mol Ecol Resour* 2021; 21(4):  
607 p. 1287-1298.
- 608 [15] Xue J, Zhou X, Zhang CX, Yu LL, Fan HW, Wang Z, et al. Genomes of the rice pest brown  
609 planthopper and its endosymbionts reveal complex complementary contributions for host  
610 adaptation. *Genome Biol* 2014; 15(12): p. 521.
- 611 [16] Kapusta A, Suh A and Feschotte C. Dynamics of genome size evolution in birds and  
612 mammals. *Proc Natl Acad Sci U S A* 2017; 114(8): p. E1460-E1469.
- 613 [17] Wolfson RL, Chantranupong L, Wyant GA, Gu X, Orozco JM, Shen K, et al. KICSTOR  
614 recruits GATOR1 to the lysosome and is necessary for nutrients to regulate mTORC1. *Nature*  
615 2017; 543(7645): p. 438-442.
- 616 [18] Stamatakis A. RAxML version 8: a tool for phylogenetic analysis and post-analysis of large  
617 phylogenies. *Bioinformatics* 2014; 30(9): p. 1312-3.
- 618 [19] F. Cui, M. X. Li, H. J. Chang, Y. Mao, H. Y. Zhang, L. X. Lu, et al.  
619 Carboxylesterase-mediated insecticide resistance: Quantitative increase induces broader metabolic  
620 resistance than qualitative change. *Pestic Biochem Physiol* 2015; 121: p. 88-96.
- 621 [20] S. Cheng, J. Ashley, J. D. Kurlito, M. Lobb-Rabe, Y. J. Park, R. A. Carrillo, et al. Molecular  
622 basis of synaptic specificity by immunoglobulin superfamily receptors in *Drosophila*. *Elife* 2019;  
623 8.
- 624 [21] C. Xu, E. Theisen, R. Maloney, J. Peng, I. Santiago, C. Yapp, et al. Control of Synaptic  
625 Specificity by Establishing a Relative Preference for Synaptic Partners. *Neuron* 2020; 106(2): p.  
626 355.
- 627 [22] Dahanukar A, Hallem EA and Carlson JR. Insect chemoreception. *Curr Opin Neurobiol* 2005;  
628 15(4): p. 423-30.
- 629 [23] Bargmann CI. Comparative chemosensation from receptors to ecology. *Nature* 2006;  
630 444(7117): p. 295-301.

- 631 [24] Wang Q, Zhou JJ, Liu JT, Huang GZ, Xu WY, Zhang Q, et al. Integrative transcriptomic and  
632 genomic analysis of odorant binding proteins and chemosensory proteins in aphids. *Insect Mol*  
633 *Biol* 2019; 28(1): p. 1-22.
- 634 [25] Youn YN. Electroantennogram responses of *Nilaparvata lugens* (Homoptera: Delphacidae) to  
635 plant volatile compounds. *J Econ Entomol* 2002; 95(2): p. 269-77.
- 636 [26] He P, Zhang J, Liu NY, Zhang YN, Yang K and Dong SL. Distinct expression profiles and  
637 different functions of odorant binding proteins in *Nilaparvata lugens* Stal. *PLoS One* 2011; 6(12):  
638 p. e28921.
- 639 [27] Xue J, Zhou X, Zhang XC, Yu LL, Fan HW, Wang Z, et al. Genomes of the rice pest brown  
640 planthopper and its endosymbionts reveal complex complementary contributions for host  
641 adaptation. *Genome Biol* 2014; 15: p. 521.
- 642 [28] Robertson HM, Robertson ECN, Walden KKO, Enders LS and Miller NJ. The  
643 chemoreceptors and odorant binding proteins of the soybean and pea aphids. *Insect Biochem Mol*  
644 *Biol* 2019; 105: p. 69-78.
- 645 [29] Pearce SL, Clarke DF, East PD, Elfekih S, Gordon KHJ, Jermin LS, et al. Genomic  
646 innovations, transcriptional plasticity and gene loss underlying the evolution and divergence of  
647 two highly polyphagous and invasive *Helicoverpa* pest species. *BMC Biol* 2017; 15(1): p. 63.
- 648 [30] McBride CS. Rapid evolution of smell and taste receptor genes during host specialization in  
649 *Drosophila sechellia*. *Proc Natl Acad Sci U S A* 2007; 104(12): p. 4996-5001.
- 650 [31] Benton R, Vannice KS, Gomez-Diaz C and Vosshall LB. Variant ionotropic glutamate  
651 receptors as chemosensory receptors in *Drosophila*. *Cell* 2009; 136(1): p. 149-62.
- 652 [32] Chen C, Buhl E, Xu M, Croset V, Rees JS, Lilley KS, et al. *Drosophila* Ionotropic Receptor  
653 25a mediates circadian clock resetting by temperature. *Nature* 2015; 527(7579): p. 516-20.
- 654 [33] Wei Q, Yu HY, Niu CD, Yao R, Wu SF, Chen Z, et al. Comparison of Insecticide  
655 Susceptibilities of *Empoasca vitis* (Hemiptera: Cicadellidae) from Three Main Tea-Growing  
656 Regions in China. *J Econ Entomol* 2015; 108(3): p. 1251-9.
- 657 [34] Wan F, Yin C, Tang R, Chen M, Wu Q, Huang C, et al. A chromosome-level genome  
658 assembly of *Cydia pomonella* provides insights into chemical ecology and insecticide resistance.  
659 *Nat Commun* 2019; 10(1): p. 4237.
- 660 [35] Jin S, Sun XL, Chen Z and Xiao B. Resistance of different tea cultivars to *Empoasca vitis*



- 661 gOTHE. *Sci. Agric. Sin* 2012; 45(2): p. 255-265.
- 662 [36] Feyereisen R. Evolution of insect P450. *Biochem Soc Trans* 2006; 34(Pt 6): p. 1252-5.
- 663 [37] Simpson AE. The cytochrome P450 4 (CYP4) family. *Gen Pharmacol* 1997; 28(3): p. 351-9.
- 664 [38] Cvijovic I, Good BH and Desai MM. The Effect of Strong Purifying Selection on Genetic  
665 Diversity. *Genetics* 2018; 209(4): p. 1235-1278.
- 666 [39] Braccioli L, Nijboer CH and Coffe PJ. Forkhead box protein P1, a key player in neuronal  
667 development? *Neural Regen Res* 2018; 13(5): p. 801-802.
- 668 [40] Chen Y, Ip FC, Shi L, Zhang Z, Tang H, Ng YP, et al. Coronin 6 regulates acetylcholine  
669 receptor clustering through modulating receptor anchorage to actin cytoskeleton. *J Neurosci* 2014;  
670 34(7): p. 2413-21.
- 671 [41] Byrne LC, Dalkara D, Luna G, Fisher SK, Clerin E, Sahel JA, et al. Viral-mediated RdCVF  
672 and RdCVFL expression protects cone and rod photoreceptors in retinal degeneration. *J Clin  
673 Invest* 2015; 125(1): p. 105-16.
- 674 [42] Milano SK, Kim YM, Stefano FP, Benovic JL and Brenner C. Nonvisual arrestin  
675 oligomerization and cellular localization are regulated by inositol hexakisphosphate binding. *J  
676 Biol Chem* 2006; 281(14): p. 9812-23.
- 677 [43] Wu J, Wang Y, Xu J, Korban SS, Fei Z, Tao S, et al. Diversification and independent  
678 domestication of Asian and European pears. *Genome Biol* 2018; 19(1): p. 77.
- 679 [44] Hirschey MD and Zhao Y. Metabolic Regulation by Lysine Malonylation, Succinylation, and  
680 Glutarylation. *Mol Cell Proteomics* 2015; 14(9): p. 2308-15.
- 681 [45] Chen J, Li F, Liu Y, Shen W, Du X, He L, et al. Systematic identification of mitochondrial  
682 lysine succinylome in silkworm (*Bombyx mori*) midgut during the larval gluttonous stage. *J  
683 Proteomics* 2018; 174: p. 61-70.
- 684 [46] Cheng Y, Wang XY, Hu H, Killiny N and Xu JP. A hypothetical model of crossing *Bombyx  
685 mori* nucleopolyhedrovirus through its host midgut physical barrier. *PLoS One* 2014; 9(12): p.  
686 e115032.
- 687 [47] Wang XY, Yu HZ, Xu JP, Zhang SZ, Yu D, Liu MH, et al. Comparative Subcellular  
688 Proteomics Analysis of Susceptible and Near-isogenic Resistant *Bombyx mori* (Lepidoptera)  
689 Larval Midgut Response to BmNPV infection. *Sci Rep* 2017; 7: p. 45690.
- 690 [48] Gu Z, Zhou Y, Xie Y, Li F, Ma L, Sun S, et al. The adverse effects of phoxim exposure in the

- 691 midgut of silkworm, *Bombyx mori*. Chemosphere 2014; 96: p. 33-8.
- 692 [49] Sagisaka A, Fujita K, Nakamura Y, Ishibashi J, Noda H, Imanishi S, et al. Genome-wide  
693 analysis of host gene expression in the silkworm cells infected with *Bombyx mori*  
694 nucleopolyhedrovirus. Virus Res 2010; 147(2): p. 166-75.
- 695 [50] Rosner J and Merzendorfer H. Transcriptional plasticity of different ABC transporter genes  
696 from *Tribolium castaneum* contributes to diflubenzuron resistance. Insect Biochem Mol Biol 2020;  
697 116: p. 103282.
- 698 [51] Koenig D, Haggmann J, Li R, Bemm F, Slotte T, Neuffer B, et al. Long-term balancing  
699 selection drives evolution of immunity genes in *Capsella*. Elife 2019; 8.
- 700 [52] Van der Hoorn RA, De Wit PJ and Joosten MH. Balancing selection favors guarding  
701 resistance proteins. Trends Plant Sci 2002; 7(2): p. 67-71.
- 702 [53] Ocelotl J, Sanchez J, Gomez I, Tabashnik BE, Bravo A and Soberon M. ABCC2 is associated  
703 with *Bacillus thuringiensis* Cry1Ac toxin oligomerization and membrane insertion in  
704 diamondback moth. Sci Rep 2017; 7(1): p. 2386.
- 705 [54] Lien NTK, Ngoc NTH, Lan NN, Hien NT, Tung NV, Ngan NTT, et al. Transcriptome  
706 Sequencing and Analysis of Changes Associated with Insecticide Resistance in the Dengue  
707 Mosquito (*Aedes aegypti*) in Vietnam. Am J Trop Med Hyg 2019; 100(5): p. 1240-1248.
- 708 [55] Sun H, Pu J, Chen F, Wang J and Han Z. Multiple ATP-binding cassette transporters are  
709 involved in insecticide resistance in the small brown planthopper, *Laodelphax striatellus*. Insect  
710 Mol Biol 2017; 26(3): p. 343-355.
- 711 [56] You M, Yue Z, He W, Yang X, Yang G, Xie M, et al. A heterozygous moth genome provides  
712 insights into herbivory and detoxification. Nat Genet 2013; 45(2): p. 220-5.
- 713 [57] Pritchard JK, Stephens M and Donnelly P. Inference of population structure using multilocus  
714 genotype data. Genetics 2000; 155(2): p. 945-59.
- 715 [58] Zhang WJ, Rong J, Wei CL, Gao LP and Chen JK. Domestication origin and spread of  
716 cultivated tea plants. Biodiversity Science 2018; 26(4): p. 357-372.
- 717 [59] Preparation committee, Records of tea varieties in China. 2001, Shanghai: Shanghai  
718 Scientific & Technical Publishers.
- 719 [60] Walker BJ, Abeel T, Shea T, Priest M, Abouelliel A, Sakthikumar S, et al. Pilon: an integrated  
720 tool for comprehensive microbial variant detection and genome assembly improvement. PLoS

- 721 One 2014; 9(11): p. e112963.
- 722 [61] Koren S, Walenz BP, Berlin K, Miller JR, Bergman NH and Phillippy AM. Canu: scalable  
723 and accurate long-read assembly via adaptive k-mer weighting and repeat separation. *Genome Res*  
724 2017; 27(5): p. 722-736.
- 725 [62] Ruan J and Li H. Fast and accurate long-read assembly with wtdbg2. *Nat Methods* 2020;  
726 17(2): p. 155-158.
- 727 [63] Chakraborty M, Baldwin-Brown JG, Long AD and Emerson JJ. Contiguous and accurate de  
728 novo assembly of metazoan genomes with modest long read coverage. *Nucleic Acids Res* 2016;  
729 44(19): p. e147.
- 730 [64] Dudchenko O, Batra SS, Omer AD, Nyquist SK, Hoeger M, Durand NC, et al. De novo  
731 assembly of the *Aedes aegypti* genome using Hi-C yields chromosome-length scaffolds. *Science*  
732 2017; 356(6333): p. 92-95.
- 733 [65] Zhang X, Zhang S, Zhao Q, Ming R and Tang H. Assembly of allele-aware,  
734 chromosomal-scale autopolyploid genomes based on Hi-C data. *Nat Plants* 2019; 5(8): p. 833-845.
- 735 [66] Keilwagen J, Hartung F, Paulini M, Twardziok SO and Grau J. Combining RNA-seq data and  
736 homology-based gene prediction for plants, animals and fungi. *BMC Bioinformatics* 2018; 19(1):  
737 p. 189.
- 738 [67] Miao J, Han BY and Zhang QH. Probing behavior of *Empoasca vitis* (Homoptera:  
739 Cicadellidae) on resistant and susceptible cultivars of tea plants. *J Insect Sci* 2014; 14.
- 740 [68] Bolger AM, Lohse M and Usadel B. Trimmomatic: a flexible trimmer for Illumina sequence  
741 data. *Bioinformatics* 2014; 30(15): p. 2114-20.
- 742 [69] Kim D, Paggi JM, Park C, Bennett C and Salzberg SL. Graph-based genome alignment and  
743 genotyping with HISAT2 and HISAT-genotype. *Nat Biotechnol* 2019; 37(8): p. 907-915.
- 744 [70] Emms DM and Kelly S. OrthoFinder: phylogenetic orthology inference for comparative  
745 genomics. *Genome Biol* 2019; 20(1): p. 238.
- 746 [71] Nakamura T, Yamada KD, Tomii K and Katoh K. Parallelization of MAFFT for large-scale  
747 multiple sequence alignments. *Bioinformatics* 2018; 34(14): p. 2490-2492.
- 748 [72] Yang Z. PAML: a program package for phylogenetic analysis by maximum likelihood.  
749 *Comput Appl Biosci* 1997; 13(5): p. 555-6.
- 750 [73] Xiao JH, Yue Z, Jia LY, Yang XH, Niu LH, Wang Z, et al. Obligate mutualism within a host

- 751 drives the extreme specialization of a fig wasp genome. *Genome Biol* 2013; 14(12): p. R141.
- 752 [74] De-Bie T, Cristianini N, Demuth JP and Hahn MW. CAFE: a computational tool for the study  
753 of gene family evolution. *Bioinformatics* 2006; 22(10): p. 1269-71.
- 754 [75] Eddy SR. Profile hidden Markov models. *Bioinformatics* 1998; 14(9): p. 755-63.
- 755 [76] Edgar RC. MUSCLE: multiple sequence alignment with high accuracy and high throughput.  
756 *Nucleic Acids Res* 2004; 32(5): p. 1792-7.
- 757 [77] Hall BG. Building phylogenetic trees from molecular data with MEGA. *Mol Biol Evol* 2013;  
758 30(5): p. 1229-35.
- 759 [78] Langmead B, Trapnell C, Pop M and Salzberg SL. Ultrafast and memory-efficient alignment  
760 of short DNA sequences to the human genome. *Genome Biol* 2009; 10(3): p. R25.
- 761 [79] Li B and Dewey CN. RSEM: accurate transcript quantification from RNA-Seq data with or  
762 without a reference genome. *BMC Bioinformatics* 2011; 12: p. 323.
- 763 [80] Haas BJ, Papanicolaou A, Yassour M, Grabherr M, Blood PD, Bowden J, et al. De novo  
764 transcript sequence reconstruction from RNA-seq using the Trinity platform for reference  
765 generation and analysis. *Nat Protoc* 2013; 8(8): p. 1494-512.
- 766 [81] Montgomery SH and Mank JE. Inferring regulatory change from gene expression: the  
767 confounding effects of tissue scaling. *Mol Ecol* 2016; 25(20): p. 5114-5128.
- 768 [82] McKenna A, Hanna M, Banks E, Sivachenko A, Cibulskis K, Kernytsky A, et al. The  
769 Genome Analysis Toolkit: a MapReduce framework for analyzing next-generation DNA  
770 sequencing data. *Genome Res* 2010; 20(9): p. 1297-303.
- 771 [83] Li H, Handsaker B, Wysoker A, Fennell T, Ruan J, Homer N, et al. The Sequence  
772 Alignment/Map format and SAMtools. *Bioinformatics* 2009; 25(16): p. 2078-9.
- 773 [84] Nguyen LT, Schmidt HA, von Haeseler A and Minh BQ. IQ-TREE: a fast and effective  
774 stochastic algorithm for estimating maximum-likelihood phylogenies. *Mol Biol Evol* 2015; 32(1):  
775 p. 268-74.
- 776 [85] Patterson N, Moorjani P, Luo Y, Mallick S, Rohland N, Zhan Y, et al. Ancient admixture in  
777 human history. *Genetics* 2012; 192(3): p. 1065-93.
- 778 [86] Danecek P, Auton A, Abecasis G, Albers CA, Banks E, DePristo MA, et al. The variant call  
779 format and VCFtools. *Bioinformatics* 2011; 27(15): p. 2156-8.
- 780 [87] Kreitman M. Methods to detect selection in populations with applications to the human. *Annu.*

781 Rev. Genomics Hum. Genet. 2000; 01: p. 539-59.

782 [88] Conesa A, Gotz S, Garcia-Gomez JM, Terol J, Talon M and Robles M. Blast2GO: a

783 universal tool for annotation, visualization and analysis in functional genomics research.

784 Bioinformatics 2005; 21(18): p. 3674-6.

785

786 **Figure legends**

787 **Figure 1. Genomic characterization of *E. onukii* and comparison with other**  
788 **insect genomes.**

789 (A) Genomic characterization of the sequenced *E. onukii*. The circles (from outermost  
790 to innermost) represent monoploid genome in Mb, segmental duplication, gene  
791 density, LTR Copia/Gypsy, DNA transposable elements and expression profiles. (B)  
792 Numerical comparison of homologous genes between gene sets from *E. onukii* and  
793 each of the five Hemiptera species. Dataset overlaps were determined using a  
794 BLASTP search ( $e$  value  $< 10^{-5}$ ). (C) Phylogenetic relationships among 15 insect  
795 species based on genomic comparisons. Single copy orthologs: only one copy in  
796 different genomes, multicopy orthologs: more than one copy in different genomes,  
797 unique paralogs: species-specific genes, other orthologs: unclassified orthologs,  
798 unclustered genes: genes that cannot be clustered into known gene families. Details  
799 about the identification are previously described [73].

800 **Figure 2. Expansion of gene families related to chemoreception and**  
801 **detoxification in *E. onukii* compared with other insect species.**

802 (A) Numerical comparison of the chemosensory proteins (CSPs) among aphids, plant  
803 bugs and hoppers. Aphid species include *Acyrtosiphon pisum* (Apis), *Myzus persicae*  
804 (Mper), *Aphis gossypii* (Agos), *Aphis glycines* (Agly) and *Sitobion avenae* (Save);  
805 Plant bugs include *Adelphocoris lineolatus* (Alin), *Adelphocoris suturalis* (Asut),  
806 *Apolygus lucorum* (Aluc); Hoppers includes *Empoasca onukii* (Eonu), *Laodelphax*  
807 *striatellus* (Lstr), *Nilaparvata lugens* (Nlug) and *Sogatella furcifera* (Sfur). (B)  
808 Phylogenetic relationships of CSPs in hoppers (*N. lugens*, *S. furcifera*, and *L.*  
809 *striatellus*), aphids (*A. pisum*, *M. persicae*, *A. gossypii*, *A. glycines*, and *S. avenae*),  
810 and plant bugs (*N. lugens*, *L. striatellus* and *S. furcifera*). Yellow branches represent  
811 CSP family genes in *E. onukii*. (C) Genomic expansion and unbalanced chromosomal  
812 distribution of CSPs in the *E. onukii* genome. (D) Phylogenetic relationships and  
813 expression profiling of detoxification-related proteins (CYP3 and CYP4) in plant

814 hoppers, aphids and plant bugs. Expression profiling based on RNA-seq data were  
815 generated from all developmental stages (egg, 1st – 5th nymph instar and adult) and 8  
816 *E. onukii* populations collected from different tea cultivars (four cultivars being  
817 resistant including LongJ, DeQ, JianD, JuY and four cultivars susceptible to *E. onukii*  
818 including ZhuS, LanT, BanZ and EnB).

819 **Figure 3. Genomic signatures of balancing selection.**

820 (A) Putative selection sweeps in populations of *E. onukii*. Tajima's *D* value was  
821 calculated for each of the *E. onukii* populations. Mean values of Tajima's *D* are shown  
822 in sliding windows of 50 kb with a step size of 10 kb. Regions with Tajima's *D* values  
823 deviated significantly from 0 are marked with dotted lines in panel 1. Specifically,  
824 values of Tajima's *D* significantly deviated from 0 are plotted in red ( $> 0$ ) and green  
825 ( $< 0$ ) respectively in panel 2 and panel 3. (B) Succinyl- and glutaryl-CoA pathways  
826 showing the regulatory role of lysine modifications in metabolism. (C) Expression  
827 patterns of the *E. onukii* genes under balancing selection, in 11 different tea cultivars.  
828 *Pyridoxal\_deC* was detected to be significantly highly expressed in susceptible tea  
829 cultivars ( $P < 0.01$ , T-test), while *Glyco\_transf\_22* was significantly highly expressed  
830 in resistant tea cultivars ( $P < 0.05$ , T-test).

831 **Figure 4. Phylogenetic relationship, population structure and expansion of *E.***  
832 ***onukii*.**

833 (A) Geographical locations (sites) of 54 samples collected from four tea-growing  
834 regions around China: Southwest region (SWR), South of the Yangtze River region  
835 (SYR), North of the Yangtze River region (NYR), and South China region (SER).  
836 Dots with different colors represent different clustered groups. (B) Phylogenetic tree  
837 of the 54 *E. onukii* samples based on RAxML and SplitsTress. Branch lengths are not  
838 scaled. Different colors of inner circle represent 4 different tea-growing regions  
839 shown in (A). Colors of outer lane represent different *E. onukii* groups based on  
840 phylogenetic analysis. (C) Genetic structure and individual ancestry with colors in  
841 each column representing ancestry proportion over range of population sizes ( $K = 2-4$ ,

842 with an optimal  $K = 3$ ).

### 843 **Table legends**

844 **Table 1. Sequencing, chromosome-scale assembly and annotation of the *E. onukii***  
845 **genome**

846 **Table 2. Chromosome-based statistics of the *E. onukii* genome**

847 **Table 3. Numerical comparison of genes related to chemoreception and**  
848 **detoxification among different insect species**

849 **Table 4. Number of populations, nuclear SNPs, and genetic diversity ( $\pi$ ) in each**  
850 **of the three clustered groups**

### 851 **Supplementary material**

852 Title for supplementary file: Supplemental\_Notes.docx

### 853 **Figure legends:**

854 **Figure S1. Damages of *E.onukii* in modern tea plantation in China.** (A) Life cycle  
855 of *E. onukii*. (B) Damages caused by *E.onukii*. (C) Developmental stages of *E. onukii*.

856 **Figure S2. Genome assembly of *E. onukii*.** (A) **Chromatin interactions with 150**  
857 **kb resolution in *E. onukii*.** (B) **Mitochondrial genome of *E. onukii*.** Inner circle  
858 represents the GC content while outer circle represents genes located on  
859 mitochondrion.

860 **Figure S3. (A) Assessment of the assembly using LTR Assembly Index (LAI). (B)**  
861 **Correlation analysis between repeat content and the genome size.**

862 **Figure S4. Gene family expansions and contractions in the *E. onukii* compared**  
863 **with other insects.** Numbers for expanded (green) and contracted (red) gene families  
864 are shown on branches.

865 **Figure S5. Expression profile of genes involved in chemoreception and**  
866 **phylogenetic analysis of odorant-binding proteins (OBPs).** (A) Expression of 5  
867 chemoreception gene families. (B) Neighbor-joining method involving 84 protein  
868 sequences was used to construct the tree. Different colors represent different species:



869 red represents *Ap. Glycines* (Agly); green represents *A. pisum* (Apis); purple  
870 represents *E. onukii* (Em) while black represents *D. melanogaster*.

871 **Figure S6. Phylogenetic analysis of olfactory receptors (ORs).** Neighbor-joining  
872 method involving 216 protein sequences was used to construct the tree. Different  
873 colors represent different species: red represents *Ap. Glycines* (Agly); green represents  
874 *A. pisum* (Apis); yellow represents *E. onukii* (Em) while blue represents *D.*  
875 *melanogaster*.

876 **Figure S7. Phylogenetic analysis of gustatory receptors (GRs).** Neighbor-joining  
877 method involving 219 protein sequences was used to construct the tree. Colors  
878 corresponded to Supplemental Figure 6.

879 **Figure S8. Phylogenetic analysis of ionotropic receptors (IRs).** Neighbor-joining  
880 method involving 125 protein sequences was used to construct the tree. Colors  
881 corresponded to Supplemental Figure 6.

882 **Figure S9. Phylogenetic analysis of P450 gene family.** Neighbor-joining method  
883 involving 259 protein sequences was used to construct the tree. Colors represented  
884 different species listed in the Figure.

885 **Figure S10. GO enrichment of the genes under balancing selection in *E. onukii*.**  
886 **Only top 20 were listed in the figures.**

887 **Figure S11. Apoptosis pathway was enriched for the genes under balancing**  
888 **selection in *E. onukii*.** Genes under selection were marked in red.

889 **Figure S12. Expression patterns of the ABC genes under balancing selection.** (A)  
890 Expression patterns of different developmental stages; (B) Expression patterns when  
891 living on resistant and susceptible tea cultivars.

892 **Figure S13. Phylogenetic tree and network estimation by RAxML and**  
893 **SplitsTress.** Three populations according to the geographic regions that most of the  
894 individuals located: group I was Yunan (YN), Eastern China (group II); and central  
895 and southern of China (group III) were listed in Red, Green, Blue respectively (right  
896 figure) with presence of the outgroups (left figure). Different 4 tea regions of China  
897 were listed in different colors represented in Figure 3.

898 **Figure S14. Admixture analysis of 55 TGLs accessions ( $k = 2-4$ ). IDs were**

- 899 **represented in Supplemental Table 12.**
- 900 **Table legends**
- 901 **Table S1. Statistics of genomic sequencing data of *Empoasca onukii***
- 902 **Table S2. Statistics of Hi-C mapping**
- 903 **Table S3. Statistics of contig level assembly of *E. onukii***
- 904 **Table S4. BUSCO analysis of genome assembly of *E. onukii***
- 905 **Table S5. BUSCO analysis of annotation completeness**
- 906 **Table S6. The statistics of different Hemiptera species assembly**
- 907 **Table S7. Assessment of genome consistency based on NGS (Illumina) reads**
- 908 **Table S8. Statistics of TEs in *E. onukii* genome**
- 909 **Table S9. GO over-representation of gene families expanded on *E.onukii* branch**
- 910 **Table S10. Gene family contraction analysis on *E.onukii* branch**
- 911 **Table S11. Chemosensory related gene families in *E. onukii***
- 912 **Table S12. List of gene families involved in detoxification**
- 913 **Table S13. Geographic distributions of the collected samples around China**
- 914 **Table S14. Genomic regions under selection**
- 915 **Table S15. Genes under selection**
- 916 **Table S16. Functional analysis of genes under purifying selection**
- 917 **Table S17. GO terms for the genes under balancing selection**

## 1 Figures

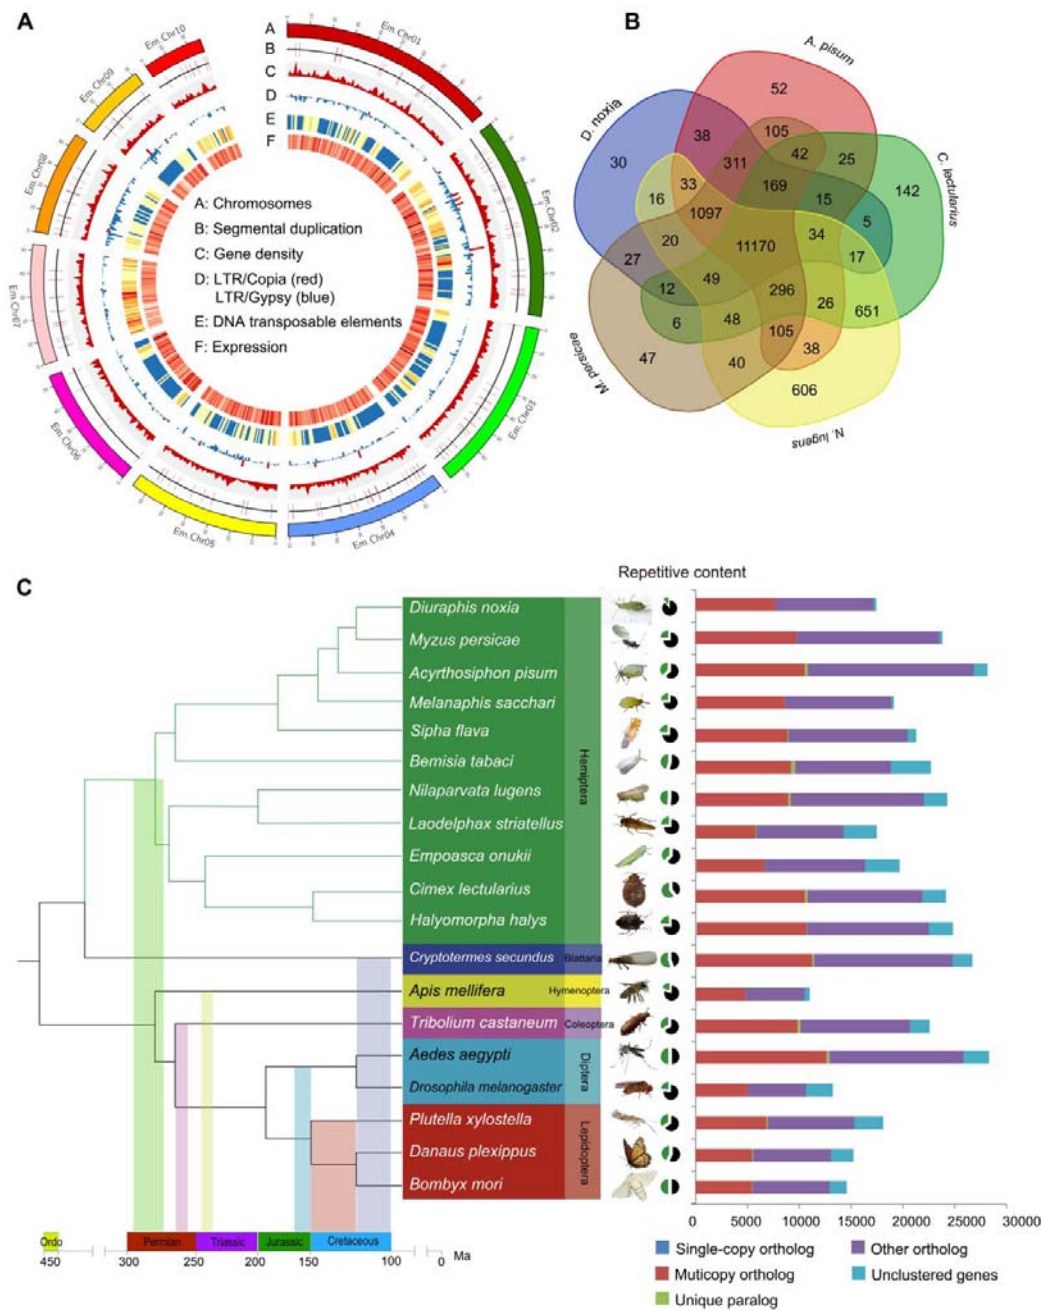

2

3 **Figure 1. Genomic characterization of *E. onukii* and comparison with other**  
 4 **insect genomes.**

5 (A) Genomic characterization of the sequenced *E. onukii*. The circles (from outermost

6 to innermost) represent monoploid genome in Mb, segmental duplication, gene  
7 density, LTR Copia/Gypsy, DNA transposable elements and expression profiles. (B)  
8 Numerical comparison of homologous genes between gene sets from *E. onukii* and  
9 each of the five Hemiptera species. Dataset overlaps were determined using a  
10 BLASTP search ( $e$  value  $< 10^{-5}$ ). (C) Phylogenetic relationships among 15 insect  
11 species based on genomic comparisons. Numbers for expanded (green) and contracted  
12 (red) gene families are shown on branches. Single copy orthologs: only one copy in  
13 different genomes, multicopy orthologs: more than one copy in different genomes,  
14 unique paralogs: species-specific genes, other orthologs: unclassified orthologs,  
15 unclustered genes: genes that cannot be clustered into known gene families. Details  
16 about the identification are previously described [73].

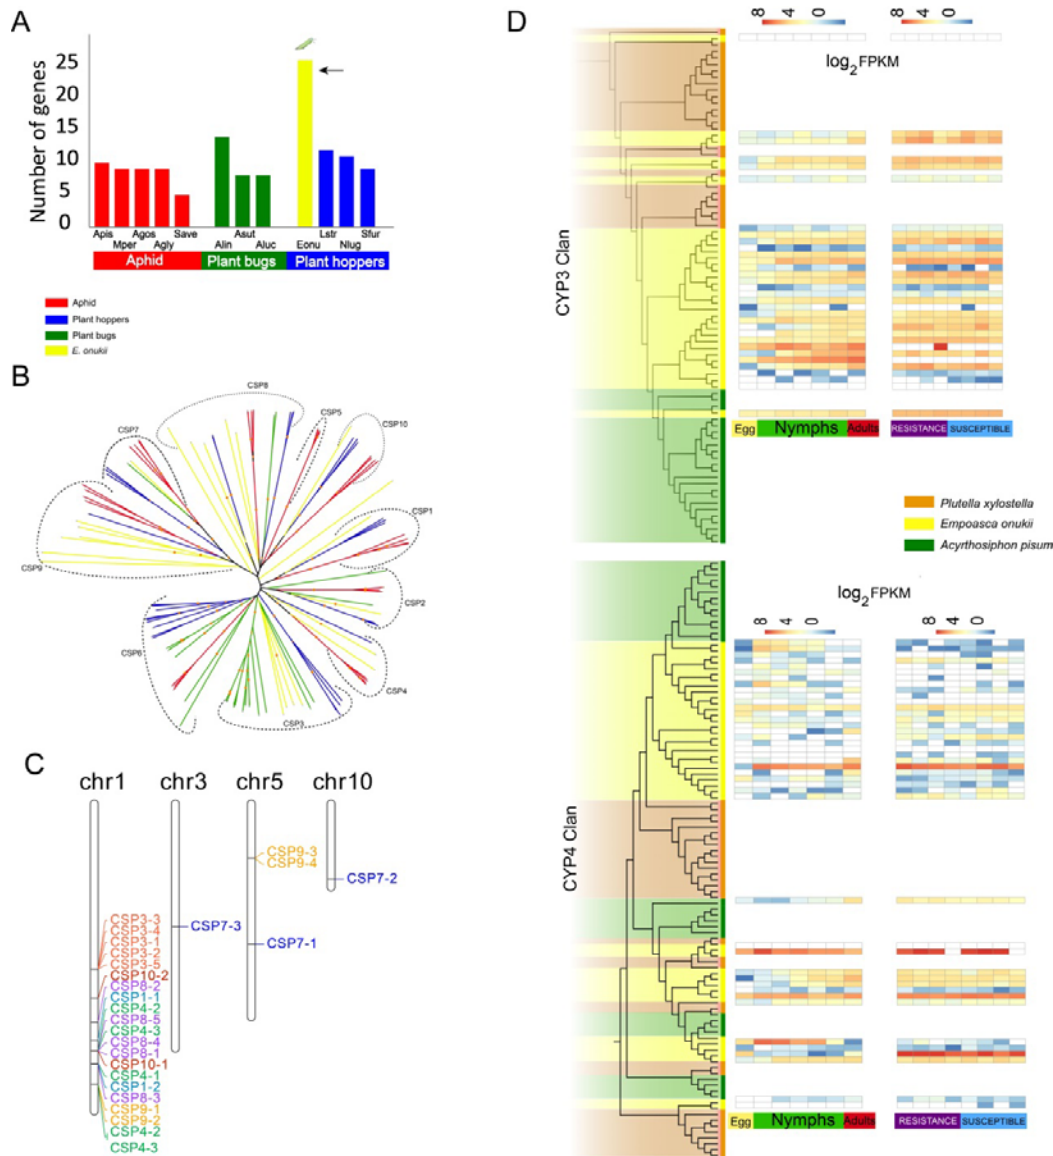

17

18 **Figure 2. Expansion of gene families related to chemoreception and**  
 19 **detoxification in *E. onukii* compared with other insect species.**

20 (A) Numerical comparison of the chemosensory proteins (CSPs) among aphids, plant  
 21 bugs and hoppers. Aphid species include *Acyrtosiphon pisum* (Apis), *Myzus persicae*  
 22 (Mper), *Aphis gossypii* (Agos), *Aphis glycines* (Agly) and *Sitobion avenae* (Save);  
 23 Plant bugs include *Adelphocoris lineolatus* (Alin), *Adelphocoris suturalis* (Asut),  
 24 *Apolygus lucorum* (Aluc); Hoppers includes *Empoasca onukii* (Eonu), *Laodelphax*  
 25 *striatellus* (Lstr), *Nilaparvata lugens* (Nlug) and *Sogatella furcifera* (Sfur). (B)  
 26 Phylogenetic relationships of CSPs in hoppers (*N. lugens*, *S. furcifera*, and *L.*  
 27 *striatellus*), aphids (*A. pisum*, *M. persicae*, *A. gossypii*, *A. glycines*, and *S. avenae*),

28 and plant bugs (*N. lugens*, *L. striatellus* and *S. furcifera*). Yellow branches represent  
 29 CSP family genes in *E. onukii*. (C) Genomic expansion and unbalanced chromosomal  
 30 distribution of CSPs in the *E. onukii* genome. (D) Phylogenetic relationships and  
 31 expression profiling of detoxification-related proteins (CYP3 and CYP4) in plant  
 32 hoppers, aphids and plant bugs. Expression profiling based on RNA-seq data were  
 33 generated from all developmental stages (egg, 1st – 5th nymph instar and adult) and  
 34 11 *E. onukii* populations collected from different tea cultivars (four cultivars being  
 35 resistant including LongJ, DeQ, JianD, JuY and four cultivars susceptible to *E. onukii*  
 36 including ZhuS, LanT, BanZ and EnB).

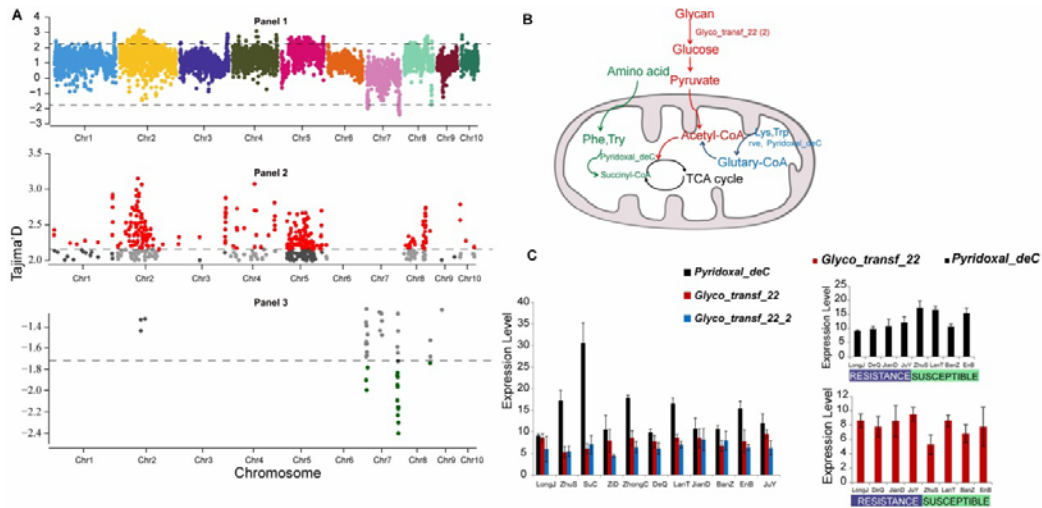

37

38 **Figure 3. Genomic signatures of balancing selection.**

39 (A) Putative selection sweeps in populations of *E. onukii*. Tajima's *D* value was  
 40 calculated for each of the *E. onukii* populations. Mean values of Tajima's *D* are shown  
 41 in sliding windows of 50 kb with a step size of 10 kb. Regions with Tajima's *D* values  
 42 deviated significantly from 0 are marked with dotted lines in panel 1. Specifically,  
 43 values of Tajima's *D* significantly deviated from 0 are plotted in red ( $> 0$ ) and green  
 44 ( $< 0$ ) respectively in panel 2 and panel 3. (B) Succinyl- and glutaryl-CoA pathways  
 45 showing the regulatory role of lysine modifications in metabolism. (C) Expression  
 46 patterns of the *E. onukii* genes under balancing selection, in 11 different tea cultivars.  
 47 *Pyridoxal\_deC* was detected to be significantly highly expressed in susceptible tea

48 cultivars ( $P < 0.01$ , T-test), while *Glyco\_transf\_22* was significantly highly expressed  
49 in resistant tea cultivars ( $P < 0.05$ , T-test).

50

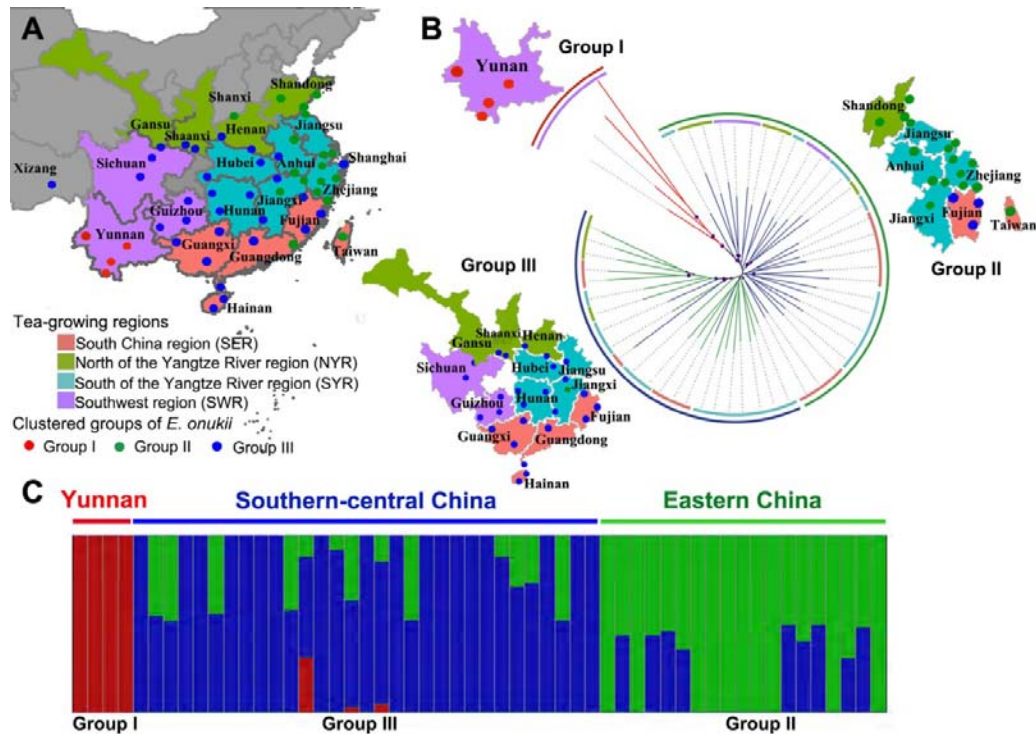

51

52 **Figure 4. Phylogenetic relationship, population structure and expansion of *E.***  
53 ***onukii*.**

54 (A) Geographical locations (sites) of 54 samples collected from four tea-growing  
55 regions around China: Southwest region (SWR), South of the Yangtze River region  
56 (SYR), North of the Yangtze River region (NYR), and South China region (SER).  
57 Dots with different colors represent different clustered groups. (B) Phylogenetic tree  
58 of the 54 *E. onukii* samples based on RAXML and SplitsTress. Branch lengths are not  
59 scaled. Different colors of inner circle represent 4 different tea-growing regions  
60 shown in Figure 2A. Colors of outer lane represent different *E. onukii* groups based  
61 on phylogenetic analysis. (C) Genetic structure and individual ancestry with colors in  
62 each column representing ancestry proportion over range of population sizes ( $K = 2-4$ ,  
63 with an optimal  $K = 3$ ).

**Table 1. Sequencing, chromosome-scale assembly and annotation of the *E. onukii* genome**

| <b>Sequencing</b>                |              |
|----------------------------------|--------------|
| Sequencing Platform              | Nanopore ONT |
| Data size (Gb)                   | 65           |
| Genome sequencing depth (×)      | 109          |
| Estimated genome size (Mb)       | ~608         |
| <b>Chromosome-scale assembly</b> |              |
| Assembly size (Mbp)              | 599          |
| % of estimated genome size       | 98.5         |
| No. of contigs                   | 1800         |
| Contig N50 (Mb)                  | 2.2          |
| Average length (bp)              | 332,835      |
| Minimum contig length (bp)       | 2,552        |
| No. of chromosomes               | 10           |
| Scaffold N50 (Mb)                | 67.98        |
| No. of unanchored contigs        | 234          |
| Length of anchored contigs (Mb)  | 592          |
| Anchor rate (%)                  | 98.83        |
| BUSCO completeness (%)           | 92.7         |
| <b>Annotation</b>                |              |
| No. of protein-coding genes      | 19,642       |
| Average gene length (bp)         | 7904         |
| Average CDS length (bp)          | 201          |
| Average exon number per gene     | 4.99         |
| BUSCO completeness (%)           | 92.5         |



**Table 2. Chromosome-based statistics of the *E. onukii* genome**

| Chromosome                                     | No. of contigs | Length (bp) |
|------------------------------------------------|----------------|-------------|
| Chr1                                           | 263            | 94,216,414  |
| Chr2                                           | 314            | 91,501,843  |
| Chr3                                           | 121            | 74,646,503  |
| Chr5                                           | 202            | 67,983,564  |
| Chr4                                           | 155            | 65,611,511  |
| Chr6                                           | 79             | 54,167,312  |
| Chr8                                           | 177            | 48,146,360  |
| Chr7                                           | 88             | 43,255,712  |
| Chr9                                           | 110            | 28,073,217  |
| Chr10                                          | 57             | 24,627,475  |
| Total number of contigs                        | 1800           |             |
| Total length of contigs (bp)                   | 599,103,029    |             |
| Total number of anchored contigs               | 1566           |             |
| Total length of chromosome level assembly (bp) | 592,229,911    |             |
| Number of unanchored contigs                   | 234            |             |
| Length of unanchored contigs                   | 7,028,718      |             |
| Anchor rate (%)                                | 98.83          |             |

**Table 3. Numerical comparison of genes related to chemoreception and detoxification among different insect species**

| Insect species          | Chemoreception |           |           |          |           | Detoxification |           |           |            |
|-------------------------|----------------|-----------|-----------|----------|-----------|----------------|-----------|-----------|------------|
|                         | Or             | Gr        | Ir        | OBP      | CSP       | COE            | ABC       | GST       | P450       |
| <i>A. pisum</i>         | 79             | 77        | 11        | 15       | 11        | 57             | 187       | 22        | 83         |
| <i>N. lugens</i>        | 50             | 10        | 25        | 11       | 17        | 79             | 40        | 11        | 67         |
| <b><i>E. onukii</i></b> | <b>20</b>      | <b>12</b> | <b>23</b> | <b>5</b> | <b>26</b> | <b>77</b>      | <b>29</b> | <b>30</b> | <b>103</b> |
| <i>P. americana</i>     | 154            | 522       | 640       | 6        | 11        | 90             | 115       | 39        | 178        |
| <i>A. mellifera</i>     | 163            | 10        | 9         | 21       | 6         | 24             | 41        | 11        | 46         |
| <i>T. castaneum</i>     | 299            | 220       | 23        | 49       | 20        | 47             | 73        | 36        | 131        |
| <i>A. gambiae</i>       | 79             | 76        | 55        | 82       | 8         | 40             | 55        | 28        | 105        |
| <i>A. aegypti</i>       | 131            | 79        | 135       | 111      | 43        | 49             | 69        | 26        | 160        |
| <i>D. melanogaster</i>  | 62             | 68        | 66        | 51       | 4         | 35             | 56        | 38        | 85         |
| <i>B. mori</i>          | 73             | 76        | 24        | 44       | 20        | 76             | 53        | 20        | 81         |
| <i>P. xylostella</i>    | 83             | 26        | 49        | 64       | 20        | 62             | 82        | 22        | 85         |

**Table 4. Number of populations, nuclear SNPs, and genetic diversity ( $\pi$ ) in each of the three clustered groups**

| <b>Group</b> | <b>No. populations</b> | <b>No. SNPs</b> | <b>No. Indels</b> | <b><math>\pi</math></b> |
|--------------|------------------------|-----------------|-------------------|-------------------------|
| Group I      | 4                      | 52,089,001      | 14,913,280        | 0.004062                |
| Group II     | 28                     | 472,824,888     | 135,096,045       | 0.004744                |
| Group III    | 22                     | 279,181,783     | 79,642,551        | 0.004662                |
